# Supplementary material for: Enhancing surgical decision-making in NEC with ResNet18: a deep learning approach to predict the need for surgery through x-ray image analysis
Source: PubMed Central journal article supplement (PMC11183801; doi:10.3389/fped.2024.1405780), 2024-06-04
Supplement: Table1.pdf [file Table1.pdf]

**Supplementary Table 1.** The Baseline Information of Patients.

| Baseline Information of Patients |                         |                             |         |                         |         |                         |                            |
|----------------------------------|-------------------------|-----------------------------|---------|-------------------------|---------|-------------------------|----------------------------|
|                                  | Hospital Stay<br>(days) | Gestation Period<br>(weeks) |         | Birth Weight<br>(grams) |         | Age when NEC<br>(weeks) | Weight when NEC<br>(grams) |
| Groups and cases                 | Mean                    | Mean                        | Std Dev | Mean                    | Std Dev | Mean                    | Mean                       |
| Surgical (113)                   | 39.7                    | 31.02                       | 4.58    | 1653.42                 | 2110.22 | 33.53                   | 1813.95                    |
| Non-Surgical (190)               | 26.97                   | 34.08                       | 3.7     | 819.05                  | 825.01  | 35.62                   | 2168.61                    |
